# Supplementary material
Source: Springer Nature journal article supplement (https://www.springermedizin.de/resource/supplementary/13221_2014_85_MOESM7_ESM.pdf/9680930)

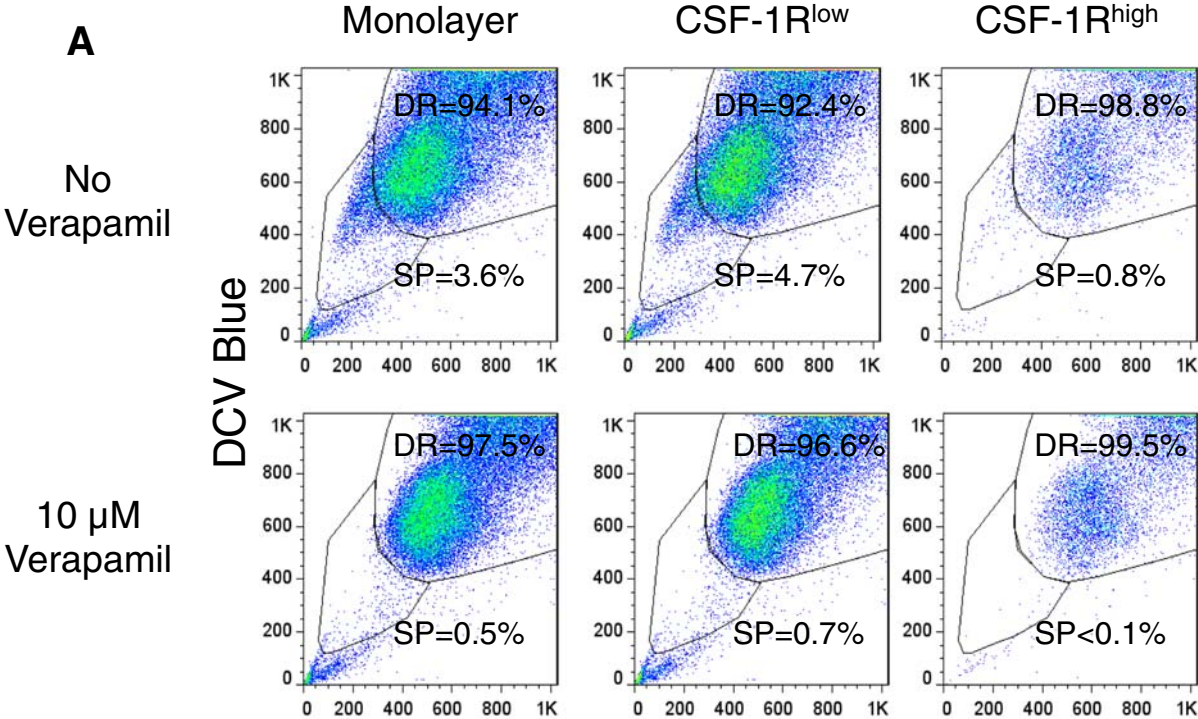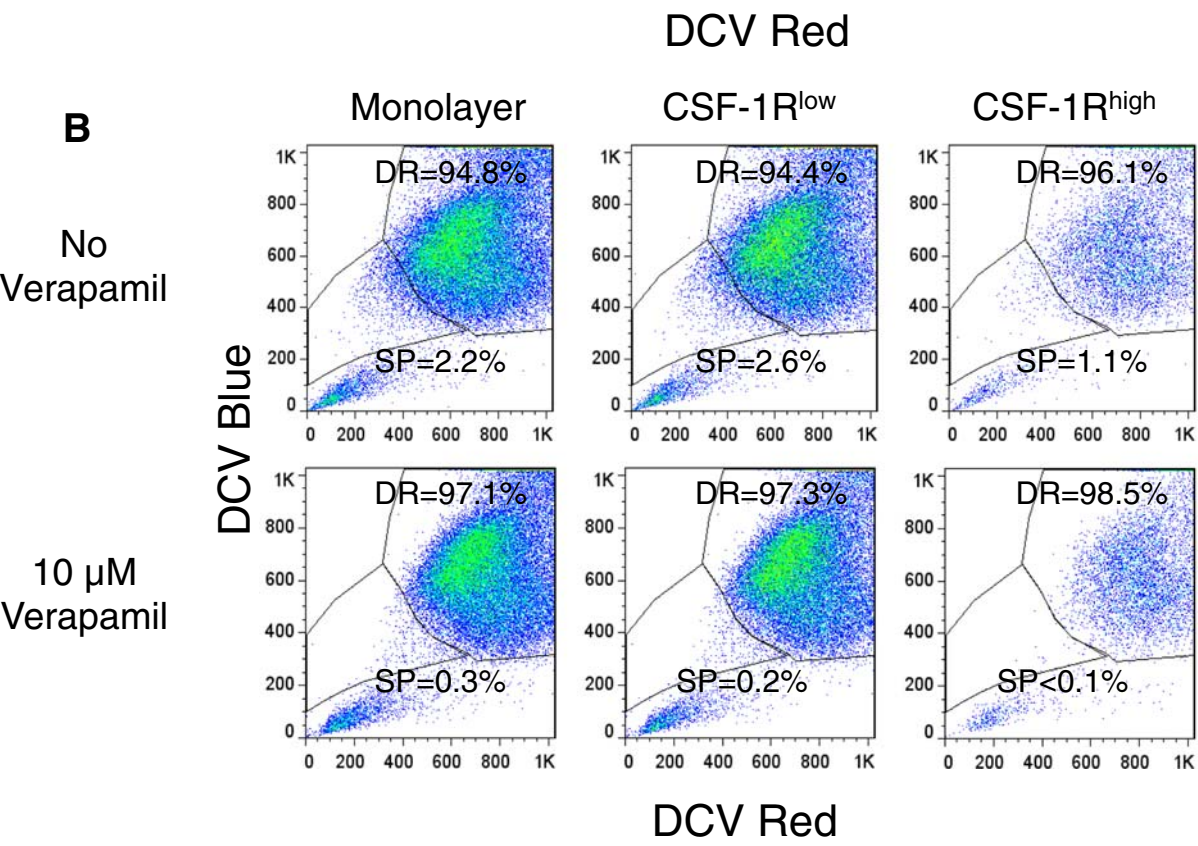

Supplement: MOESM7 [file 9680930]
